# Supplementary material for: Treatment outcome of patients with recurrent glioblastoma multiforme: a retrospective multicenter analysis
Source: PubMed Central journal article supplement (PMC5658463; doi:10.1007/s11060-017-2564-z), 2017-07-20

**Supplementary Fig. S2.** Kaplan-Meier curves of (A) overall survival and (B) progression-free survival for patients completing the Stupp regimen.

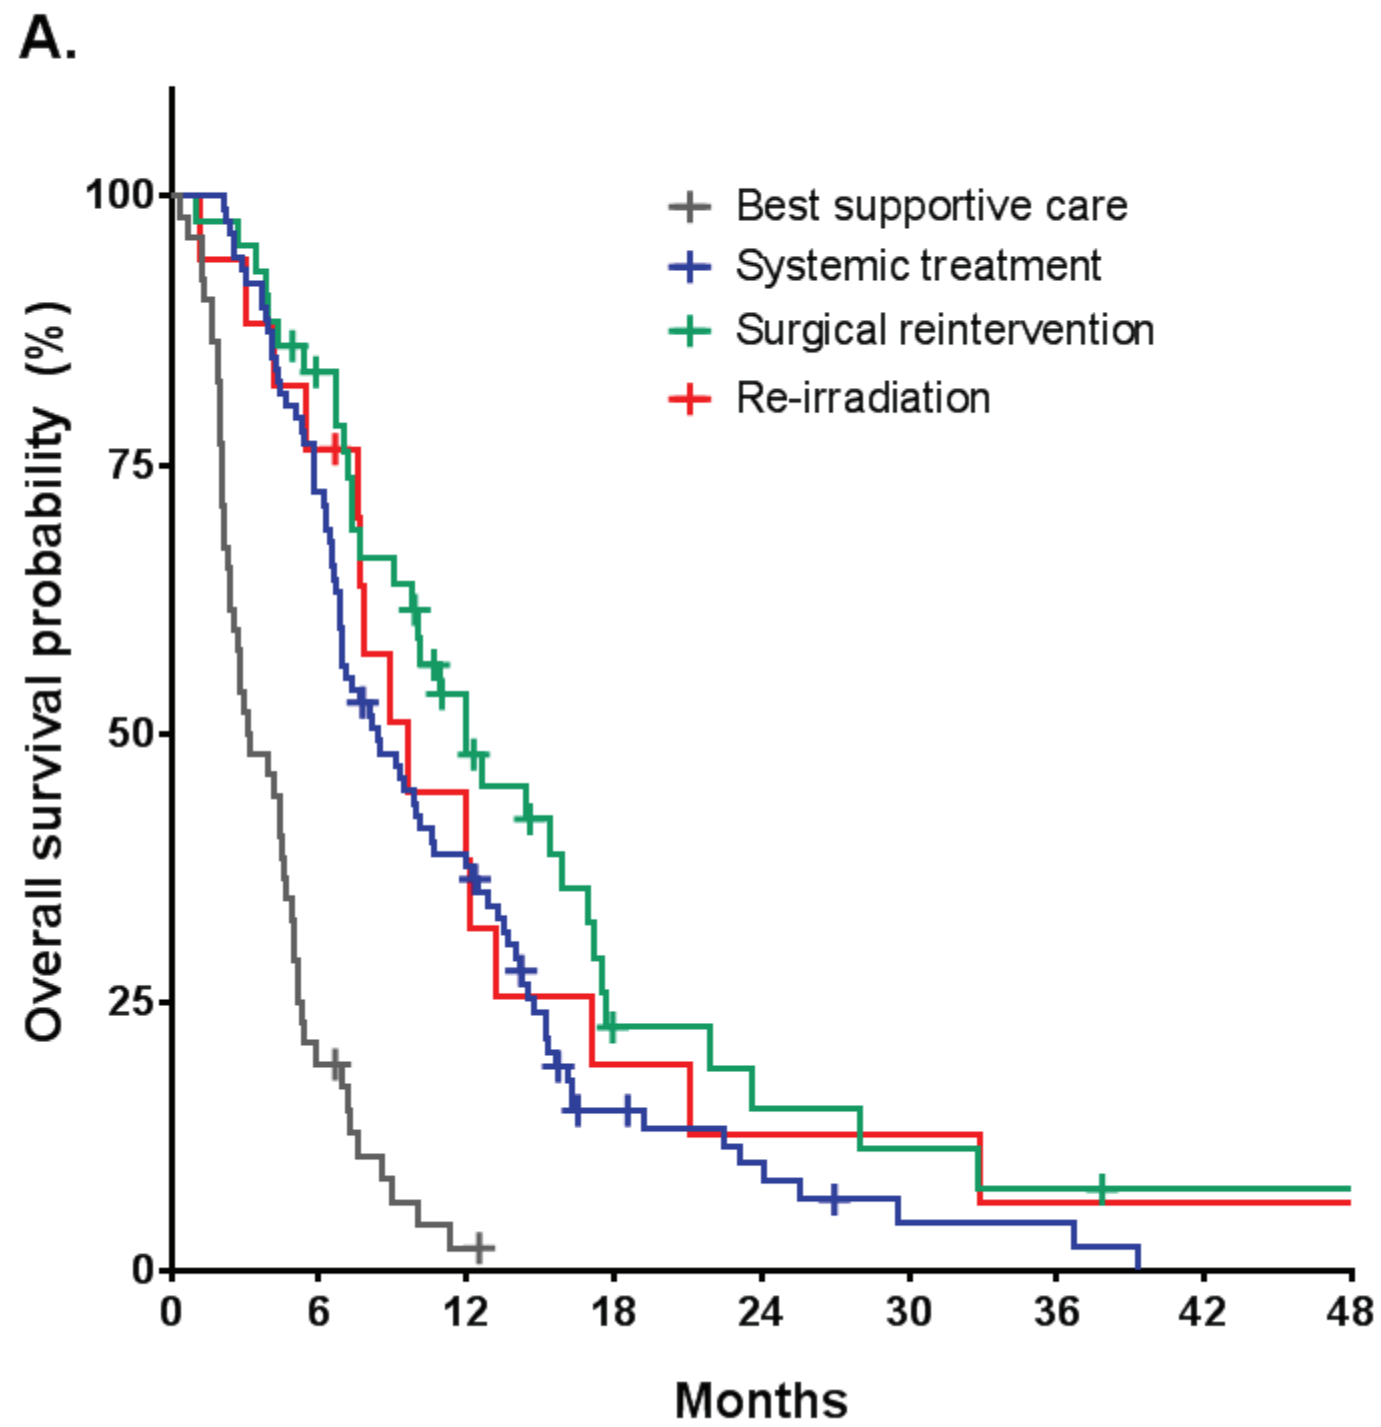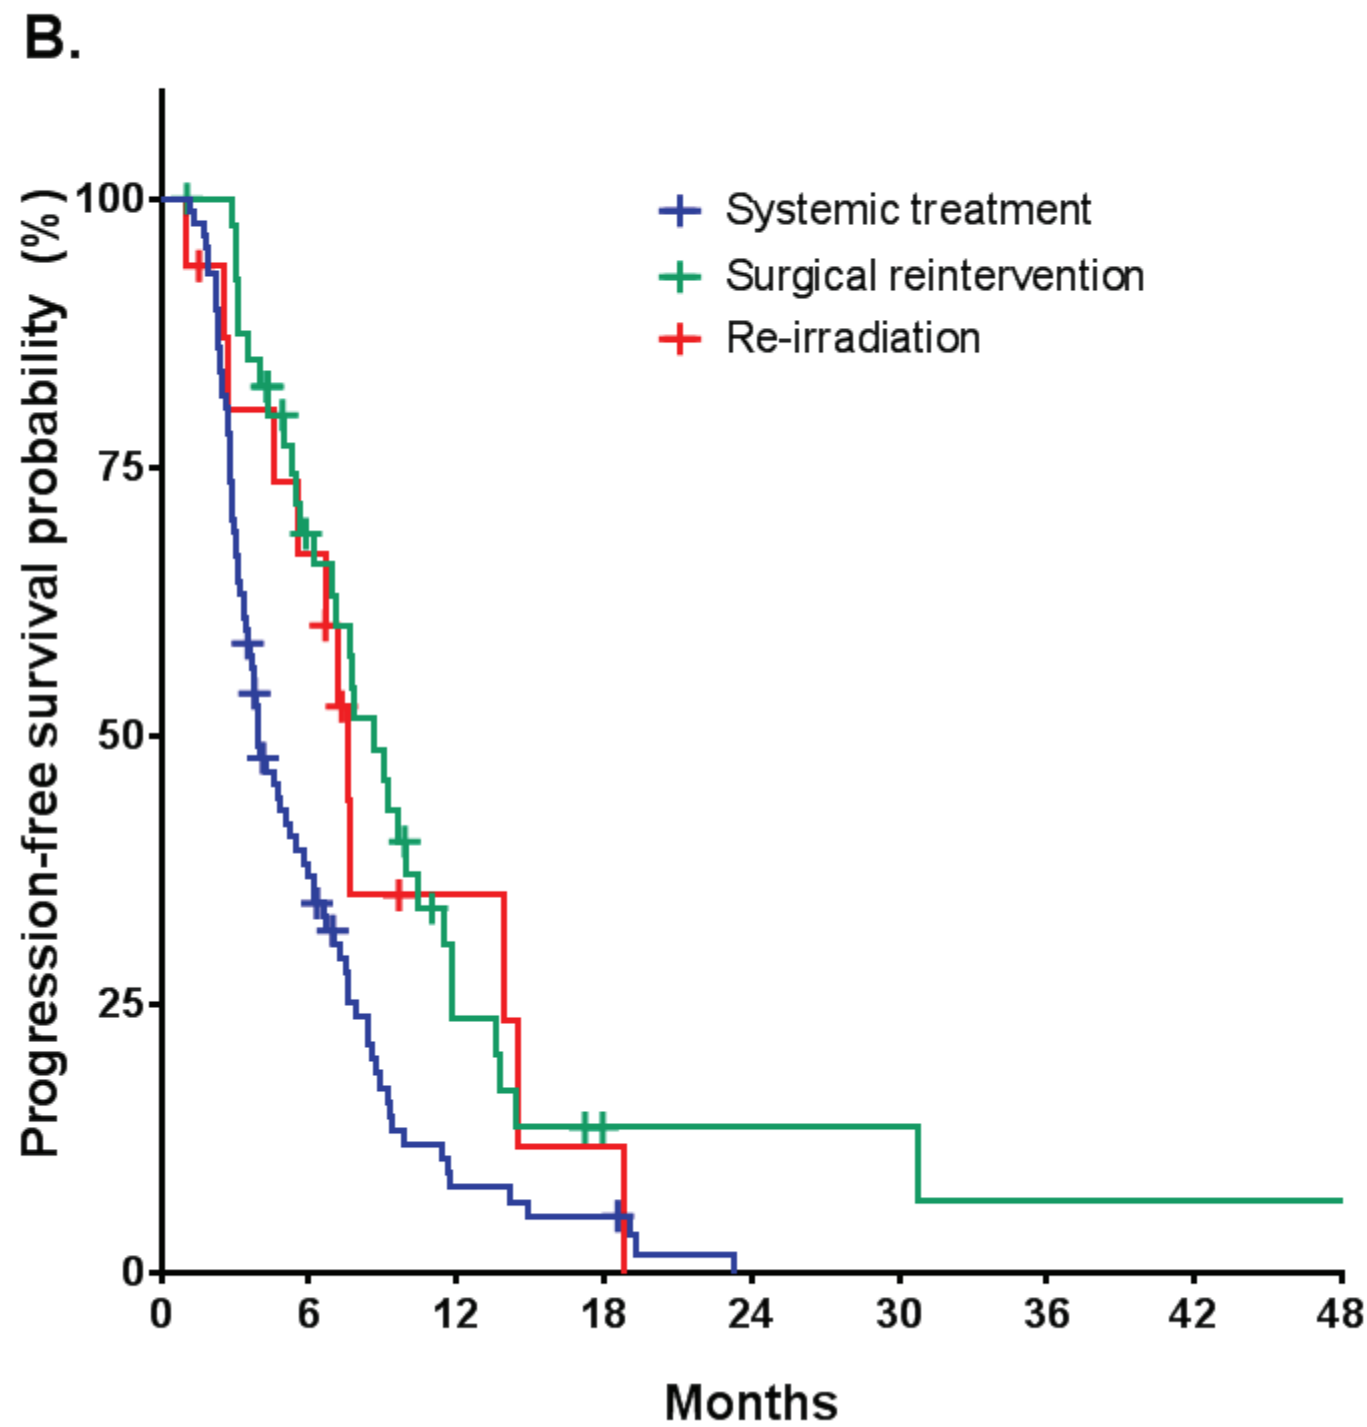

Supplement: 11060_2017_2564_MOESM2_ESM.pdf [file 11060_2017_2564_MOESM2_ESM.pdf]
